# Supplementary material for: Association between Chronic Exposure to Ambient Air Pollutants, Demography, Vaccination Level, and the Spread of COVID-19 during 2021 Delta Variant Morbidity Wave
Source: MDPI journal article supplement (doi:10.3390/atmos13111845), 2022-11-06
Supplement: s1 [file s1]

## Supplementary materials

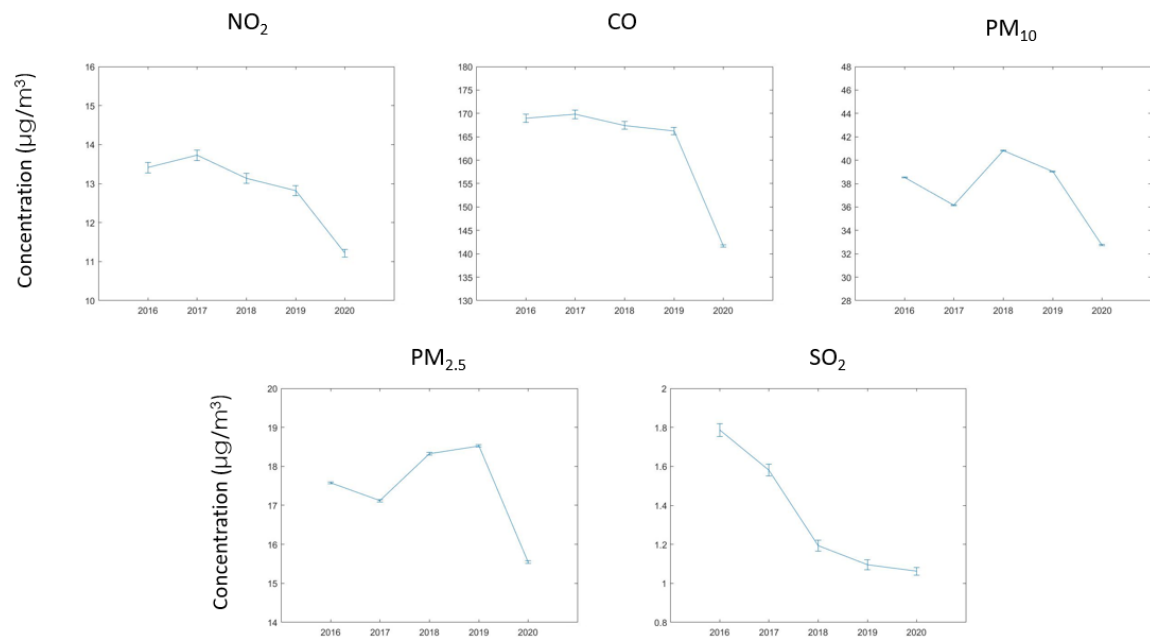

**Figure S1:** Annual national average concentrations (and standard error bars) of air pollutants in Israel: 2016-2020: NO<sub>2</sub>, CO, PM<sub>10</sub>, PM<sub>2.5</sub> and SO<sub>2</sub>.

**Table S1:** Spearman correlation results: coefficients and p-values of the correlations between demographic parameters and COVID-19 morbidity rates on specific time points in the Delta variant morbidity wave. Color scale: red indicates negative correlation and green indicates positive correlation.

| Type of parameter | parameter                            | 15 August 2021 |         | 22 August 2021 |         | 3 September 2021 |         |
|-------------------|--------------------------------------|----------------|---------|----------------|---------|------------------|---------|
|                   |                                      | r              | p-value | r              | p-value | r                | p-value |
| Demographic       | Natural growth                       | -0.31          | <0.01   | -0.7           | <0.01   | -0.75            | <0.01   |
|                   | Socioeconomic cluster                | 0.57           | <0.01   | 0.93           | <0.01   | 0.82             | <0.01   |
|                   | Total population                     | 0.38           | <0.01   | 0.36           | <0.01   | 0.15             | 0.04    |
|                   | Rate of elderly                      | 0.82           | <0.01   | 0.54           | <0.01   | 0.22             | <0.01   |
|                   | Density                              | 0.5            | <0.01   | 0.36           | <0.01   | 0.28             | <0.01   |
| Immunization      | 2 <sup>nd</sup> dose immunized ratio | -0.41          | <0.01   | -0.1           | 0.18    | -0.12            | 0.09    |
| Air pollution     | SO <sub>2</sub>                      | 0.56           | <0.01   | 0.51           | <0.01   | 0.51             | <0.01   |
|                   | PM <sub>2.5</sub>                    | 0.4            | <0.01   | 0.37           | <0.01   | 0.19             | 0.01    |
|                   | PM <sub>10</sub>                     | 0.47           | <0.01   | 0.43           | <0.01   | 0.2              | 0.005   |
|                   | CO                                   | 0.4            | <0.01   | 0.35           | <0.01   | 0.13             | 0.07    |
|                   | NO <sub>2</sub>                      | 0.4            | <0.01   | 0.37           | <0.01   | 0.16             | 0.03    |

**Table S2:** Multivariate linear regressions results: coefficients and p-values for predicting the COVID-19 rate based on a single air pollutant and selected demographic features. Color scale: red indicates negative correlation and green indicates positive correlation.

| 15 August 2021                       |          |          |          |          |          |
|--------------------------------------|----------|----------|----------|----------|----------|
| <i>beta</i>                          | NO2      | CO       | PM2.5    | PM10     | SO2      |
| Intercept                            | 6.8767   | 6.9188   | 7.0506   | 6.45     | 7.0173   |
| Total population                     | 0.29069  | 0.49484  | 0.54727  | 0.57948  | 0.50416  |
| Population density                   | 4.3139   | 4.5449   | 5.3141   | 4.3141   | 5.2039   |
| Ratio of elderly                     | -0.11512 | -0.06831 | 0.70994  | 0.008771 | 0.032737 |
| Air pollutant                        | 1.3149   | 2.0043   | 0.076247 | 1.5621   | 0.71847  |
| 2 <sup>nd</sup> dose immunized ratio | -0.37246 | -0.27041 | -0.17763 | -0.47704 | -0.02489 |
| <i>P-values</i>                      | NO2      | CO       | PM2.5    | PM10     | SO2      |
| Intercept                            | 3.28E-62 | 3.45E-62 | 7.64E-56 | 3.73E-57 | 8.45E-61 |
| Total population                     | 0.51944  | 0.27494  | 0.25923  | 0.17744  | 0.28748  |
| Population density                   | 3.10E-19 | 1.36E-21 | 1.15E-26 | 7.25E-22 | 8.08E-28 |
| Ratio of elderly                     | 0.88356  | 0.93153  | 0.39316  | 0.99058  | 0.96976  |
| Air pollutant                        | 2.50E-06 | 1.35E-05 | 0.72712  | 2.58E-09 | 0.019246 |
| 2 <sup>nd</sup> dose immunized ratio | 0.48646  | 0.61632  | 0.75797  | 0.35295  | 0.96505  |

  

| 3 September 2021                     |          |          |          |          |          |
|--------------------------------------|----------|----------|----------|----------|----------|
| <i>Beta</i>                          | NO2      | CO       | PM2.5    | PM10     | SO2      |
| Intercept                            | -5.6933  | -5.6448  | -6.0962  | -5.9946  | -5.8263  |
| Total population                     | -0.29836 | -0.26416 | -0.38975 | -0.24077 | -0.35811 |
| Population density                   | 0.64071  | 0.7749   | 0.53053  | 0.30613  | 0.58912  |
| Ratio of elderly                     | 2.2385   | 2.3703   | 2.2968   | 1.9209   | 1.596    |
| Air pollutant                        | 0.19028  | 0.02103  | 0.55914  | 0.74474  | 1.0522   |
| 2 <sup>nd</sup> dose immunized ratio | 0.18612  | 0.16254  | 0.74392  | 0.14135  | 0.62716  |
| <i>P-values</i>                      | NO2      | CO       | PM2.5    | PM10     | SO2      |
| Intercept                            | 1.34E-40 | 1.47E-40 | 3.04E-38 | 2.48E-41 | 3.98E-44 |
| Total population                     | 0.54584  | 0.59111  | 0.42232  | 0.61635  | 0.45119  |
| Population density                   | 0.16528  | 0.083021 | 0.19673  | 0.47981  | 0.13578  |
| Ratio of elderly                     | 0.003471 | 0.001924 | 0.001488 | 0.009044 | 0.031272 |
| Air pollutant                        | 0.52294  | 0.96579  | 0.017358 | 0.008215 | 0.000906 |
| 2 <sup>nd</sup> dose immunized ratio | 0.79374  | 0.81978  | 0.31532  | 0.83899  | 0.3711   |
